# Supplementary material for: Development and Verification of a Prognostic Stemness-Related Gene Signature in Triple-Negative Breast Cancer
Source: Hindawi journal article supplement (doi:10.1155/2023/6242355), 2023-02-25
Supplement: f1 [file 6242355.f1.pdf]

Supplementary table 1. Primer information.

|         |   |                         |
|---------|---|-------------------------|
| CRHR2   | F | GGTCCCTACTCCTACTGCAAC   |
|         | R | CCAAGCATTCTCGATAGGCATTC |
| MALL    | F | GCCCGAGCTGATATTTGGGTT   |
|         | R | CAGGCTGTCCAGAACTCTCC    |
| LMTK3   | F | GAGCAACGCAAGTTCATCTCG   |
|         | R | TCGGAGGTAACGCTTCAGGT    |
| UCN     | F | CAACCCTTCTCTGTCCATTGAC  |
|         | R | CGAGTCGAATATGATGCGGTTC  |
| FDPS    | F | TGTGACCGGCAAAATTGGC     |
|         | R | GCCCGTTGCAGACACTGAA     |
| HK2     | F | TGCCACCAGACTAAACTAGACG  |
|         | R | CCCGTGCCCACAATGAGAC     |
| ST3GAL5 | F | TCCCTGCAATGGTACACCC     |
|         | R | ACTTGGGACGACATTCCTTCT   |
